# Supplementary material for: Involvement of G-Protein-Coupled Receptor 40 in the Inhibitory Effects of Docosahexaenoic Acid on SREBP1-Mediated Lipogenic Enzyme Expression in Primary Hepatocytes
Source: PubMed Central journal article supplement (PMC6600346; doi:10.3390/ijms20112625), 2019-05-28

# Supplementary Figure 1

**A**

| GO term                          | Benjamini | GO term                         | Benjamini |
|----------------------------------|-----------|---------------------------------|-----------|
| Lipid metabolic process          | 5.5E-42   | Lipid metabolic process         | 5.2E-14   |
| Cholesterol biosynthetic process | 6.5E-21   | Fatty acid metabolic process    | 6.5E-14   |
| Oxidation-reduction process      | 7.6E-21   | Fatty acid metabolic process    | 2.7E-09   |
| Sterol biosynthetic process      | 1.6E-20   | Fatty acid biosynthetic process | 2.6E-07   |
| Fatty acid metabolic process     | 3.3E-20   | Acetyl-CoA metabolic process    | 4.3E-06   |
| Steroid metabolic process        | 1.1E-18   |                                 |           |
| Steroid biosynthetic process     | 5.4E-18   |                                 |           |
| Fatty acid biosynthetic process  | 3.8E-15   |                                 |           |
| Cholesterol metabolic process    | 5.9E-14   |                                 |           |
| Metabolic process                | 6.4E-11   |                                 |           |

**B**

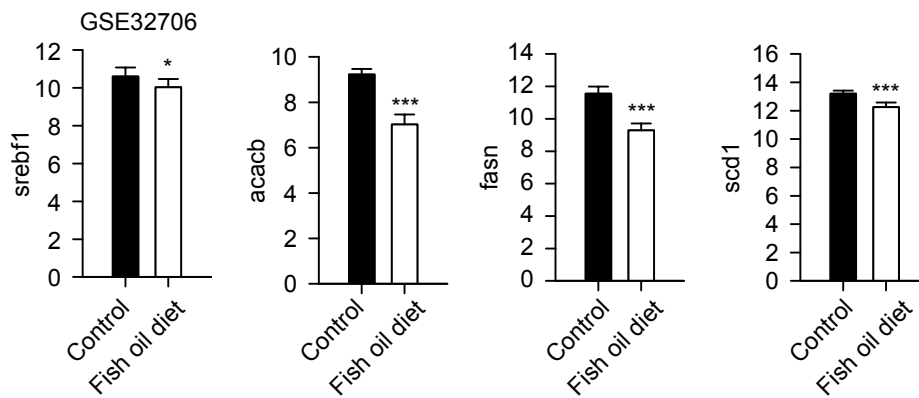

# Supplementary Figure 2

**A**

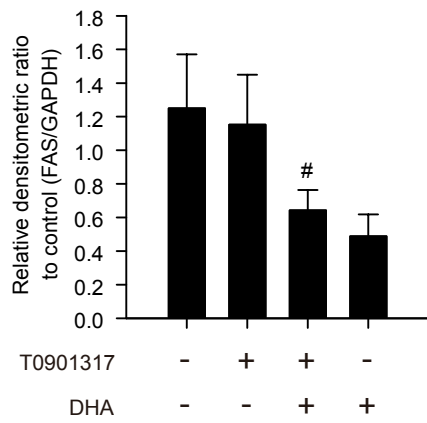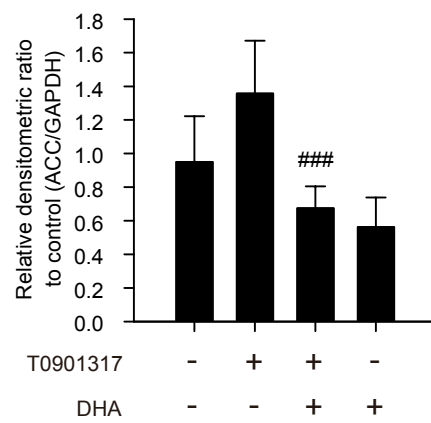

**B**

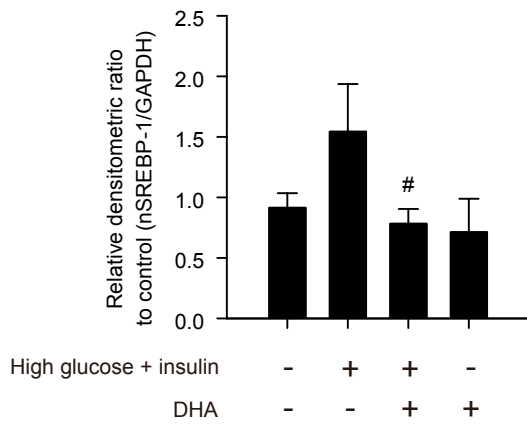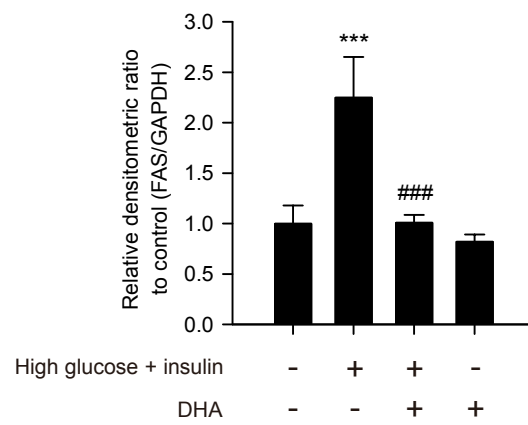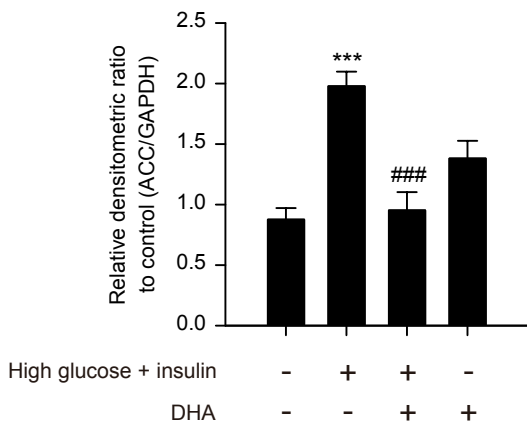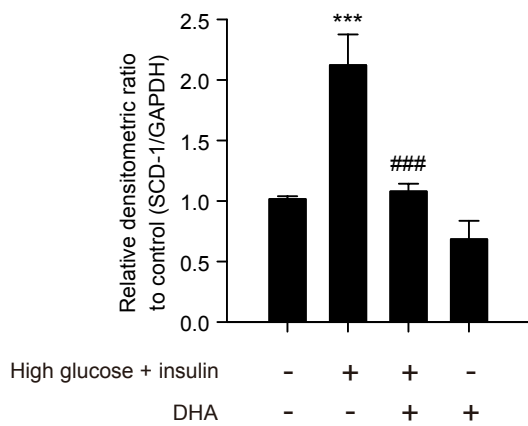

# Supplementary Figure 3

**A**

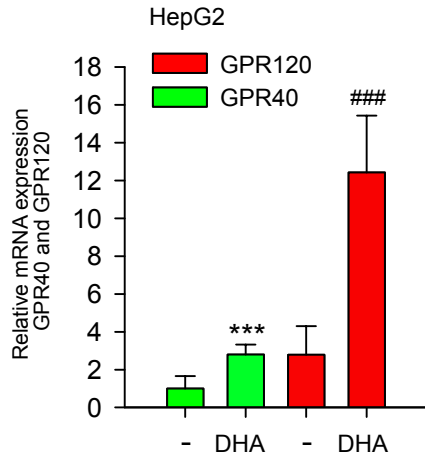

**B**

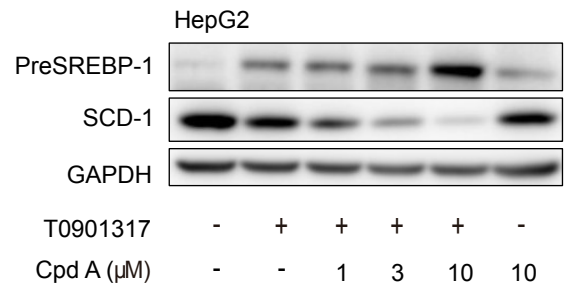

**C**

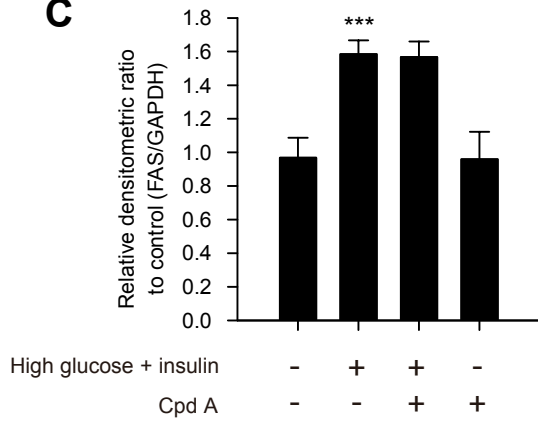

**D**

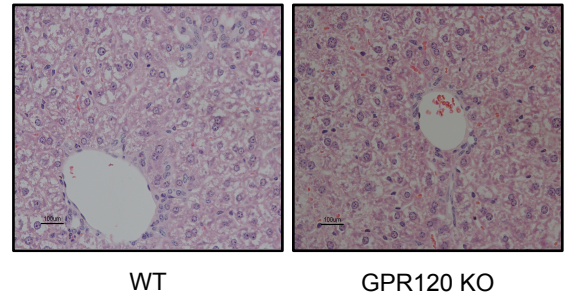

**E**

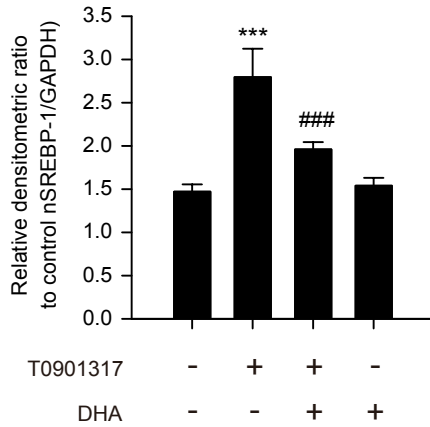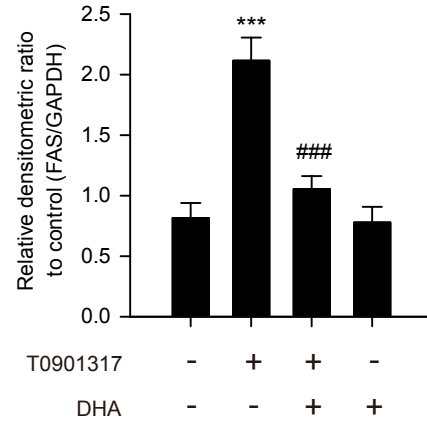

**F**

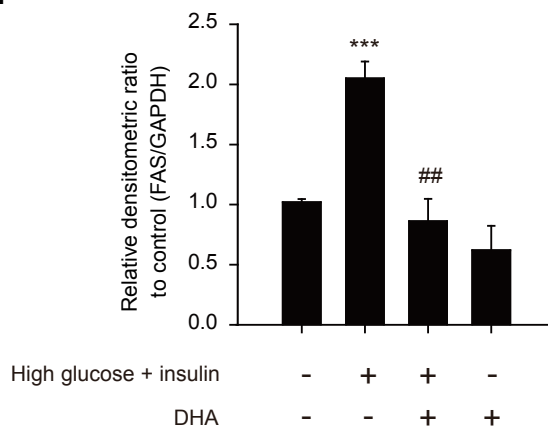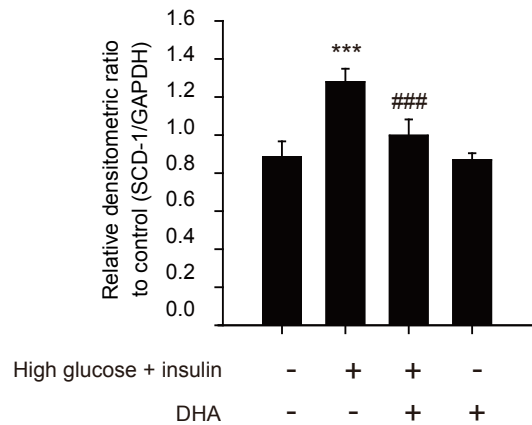

Supplement: ijms-20-02625-s001.pdf [file ijms-20-02625-s001.pdf]
